# Supplementary material for: Requirement for CD40/CD40L Interactions for Development of Autoimmunity Differs Depending on Specific Checkpoint and Costimulatory Pathways
Source: PubMed Central journal article supplement — Immunohorizons. Author manuscript; Available in PMC 2019 Jan 1. (PMC6309431; doi:10.4049/immunohorizons.1700069), 2018-01-01
Supplement: NIHMS980403-supplement-supplement_1.pdf [file NIHMS980403-supplement-supplement_1.pdf]

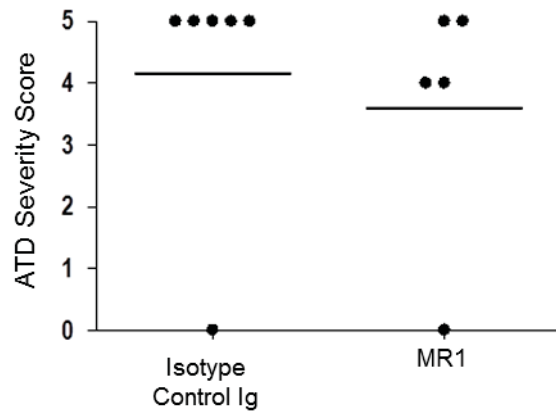

**Supplemental Figure 1.** MR1 has no effect on ATD if given after thyroid lesions begin to develop. ATD was measured in CD28<sup>-/-</sup> NOD.H-2h4 male mice, given MR1 or isotype control at 10 wk of age, 2 wk after they received NaI-supplemented water to promote ATD, age:14 weeks of age, n=4.

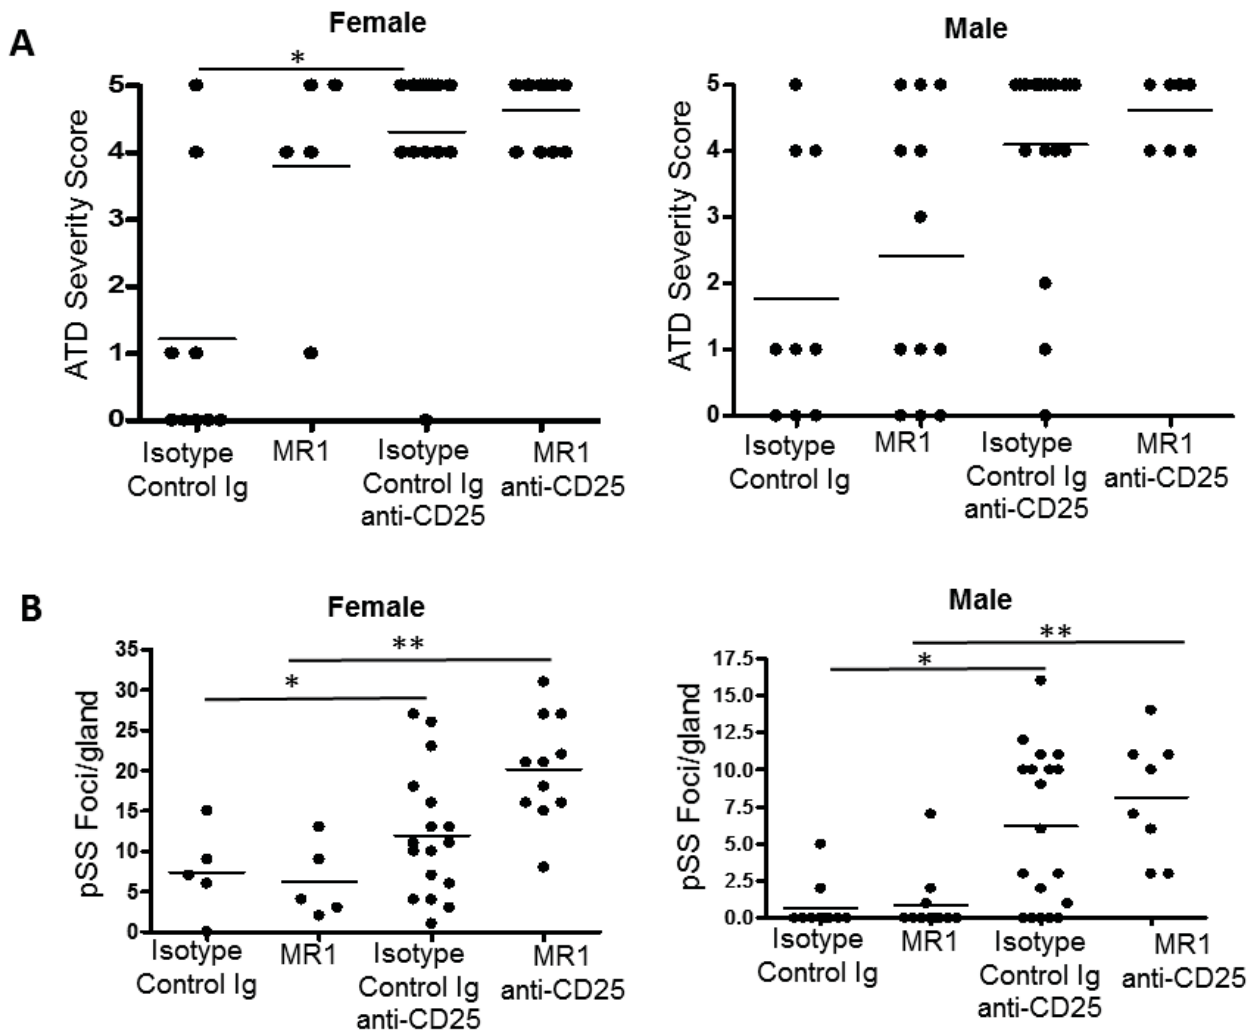

**Supplemental Figure 2.** Transient depletion of Treg greatly increases the incidence of severe ATD and pSS in PD-1<sup>-/-</sup> NOD.H-2h4 mice. ATD (A) and pSS (B) disease scores were measured in 14-16 wk old PD-1<sup>-/-</sup> NOD.H-2h4 females (left) or males (right), 6-7 wk old, given anti-CD25 or rat IgG. Some were given MR1 or isotype control mAb as indicated, (A)\* p<0.05: Isotype control vs. anti-CD25 isotype control; (B) Isotype vs. anti-CD25 isotype (\*p<0.05) and MR1 vs. MR1/anti-CD25 (\*\* p<0.005).
